# Supplementary material
Source: PubMed Central journal article supplement (PMC8514161)
Supplement: NIHMS1737157-supplement-1737157_Sup_info.pdf [file NIHMS1737157-supplement-1737157_Sup_info.pdf]

1                                   **An Atlas of Cortical Arealization Identifies Dynamic Molecular Signatures**

2  
3 **Aparna Bhaduri<sup>1,2,3\*#</sup>, Carmen Sandoval-Espinosa<sup>1,2\*</sup>, Marcos Otero-Garcia<sup>4</sup>, Irene Oh<sup>4</sup>, Raymund Yin<sup>4</sup>,**  
4 **Ugomma C. Eze<sup>1,2</sup>, Tomasz J. Nowakowski<sup>1,5</sup>, Arnold R. Kriegstein<sup>1,2#</sup>**

- 5  
6       1. **Department of Neurology, University of California, San Francisco (UCSF), San Francisco, CA,**  
7       **USA.**
- 8       2. **The Eli and Edythe Broad Center of Regeneration Medicine and Stem Cell Research, University**  
9       **of California, San Francisco (UCSF), San Francisco, CA, USA.**
- 10      3. **Current Address: Department of Biological Chemistry, Los Angeles (UCLA), Los Angeles, CA**  
11      **USA.**
- 12      4. **Rebus Biosystems, Inc., Santa Clara, CA**
- 13      5. **Department of Anatomy, University of California, San Francisco (UCSF), San Francisco, CA,**  
14      **USA.**

15 **\*These authors contributed equally.**

16 **#Correspondence should be addressed to [ABhaduri@mednet.ucla.edu](mailto:ABhaduri@mednet.ucla.edu) or [Arnold.Kriegstein@ucsf.edu](mailto:Arnold.Kriegstein@ucsf.edu)**

17

18 **Table of Contents**

19

20 Supplementary Table 1.

21 Supplementary Table 2.

22 Supplementary Table 3.

23 Supplementary Table 4.

24 Supplementary Table 5.

25 Supplementary Table 6.

26 Supplementary Table 7.

27 Supplementary Table 8.

28 Supplementary Table 9.

29 Supplementary Table 10.

30 Supplementary Table 11.

31 Supplementary Table 12.

32 Supplementary Table 13.

33 Supplementary Table 14.

34 Supplementary Table 15.

35 Supplementary Table 16.

36

37

38 **Supplementary Table Legends**

39  
40 **Supplementary Table 1.** Table of metadata for all cells from the whole brain analysis.

41 **Supplementary Table 2.** Cluster markers for the final iteration of whole brain combined clustering analysis.  
42 Markers were calculated using the one-sided Wilcoxon rank sum test. Table shows gene name, p-value, average  
43 log<sub>2</sub> fold change, the percentage of cells within the cluster expressing the gene (pct.1), the percentage of cells  
44 outside the cluster expressing the gene (pct.2), and adjusted p-value. Positive log-fold change values indicate  
45 that the feature is more highly expressed in the cluster of interest.

46 **Supplementary Table 3.** Region specific marker genes, including those at the cell type specific level. Markers  
47 were calculated using the one-sided Wilcoxon rank sum test. Table shows gene name, p-value, average log<sub>2</sub>  
48 fold change, the percentage of cells within the cluster expressing the gene (pct.1), the percentage of cells outside  
49 the cluster expressing the gene (pct.2), and adjusted p-value. Positive log-fold change values indicate that the  
50 feature is more highly expressed in the cluster of interest.

51 **Supplementary Table 4.** Cell type specific differential expression across the neocortex, allocortex  
52 (hippocampus), and proneocortex (cingulate). Markers were calculated using the one-sided Wilcoxon rank sum  
53 test. Table shows gene name, p-value, average log<sub>2</sub> fold change, the percentage of cells within the cluster  
54 expressing the gene (pct.1), the percentage of cells outside the cluster expressing the gene (pct.2), and adjusted  
55 p-value. Positive log-fold change values indicate that the feature is more highly expressed in the cluster of  
56 interest.

57 **Supplementary Table 5.** Table of metadata for all neocortex cells.

58 **Supplementary Table 6.** Cluster markers for the final iteration of the neocortex combined clustering analysis.  
59 Markers were calculated using the one-sided Wilcoxon rank sum test. Table shows gene name, p-value, average  
60 log<sub>2</sub> fold change, the percentage of cells within the cluster expressing the gene (pct.1), the percentage of cells  
61 outside the cluster expressing the gene (pct.2), and adjusted p-value.

62 **Supplementary Table 7.** Broader cell type signatures for radial glia, IPCs, and excitatory neurons used for  
63 module eigengene analysis.

64 **Supplementary Table 8.** All differentially expressed genes by cell type across all cortical areas. Markers were  
65 calculated using the one-sided Wilcoxon rank sum test. Table shows gene name, p-value, average log<sub>2</sub> fold  
66 change, the percentage of cells within the cluster expressing the gene (pct.1), the percentage of cells outside  
67 the cluster expressing the gene (pct.2), and adjusted p-value.

68 **Supplementary Table 9.** CellxFeature matrix for all spots assigned to cells for the PFC slice analysis, includes  
69 x-y coordinates of the GW20 tissue.

70 **Supplementary Table 10.** CellxFeature matrix for all spots assigned to cells for the somatosensory cortex slice  
71 analysis, includes x-y coordinates of the GW20 tissue.

72 **Supplementary Table 11.** CellxFeature matrix for all spots assigned to cells for the temporal cortex slice  
73 analysis, includes x-y coordinates of the GW20 tissue.

74 **Supplementary Table 12.** CellxFeature matrix for all spots assigned to cells for the V1 cortex slice analysis,  
75 includes x-y coordinates of the GW20 tissue.

76 **Supplementary Table 13.** CellxFeature matrix for all spots assigned to cells for the PFC slice analysis, includes  
77 x-y coordinates of the GW16 tissue.

78 **Supplementary Table 14.** CellxFeature matrix for all spots assigned to cells for the somatosensory cortex slice  
79 analysis, includes x-y coordinates of the GW16 tissue.

80 **Supplementary Table 15.** CellxFeature matrix for all spots assigned to cells for the temporal cortex slice  
81 analysis, includes x-y coordinates of the GW16 tissue.

82 **Supplementary Table 16.** CellxFeature matrix for all spots assigned to cells for the V1 cortex slice analysis,  
83 includes x-y coordinates of the GW16 tissue.
